# Supplementary material
Source: PubMed Central journal article supplement (PMC7668332)
Supplement: hae-13-e008937-s001.pdf [file hae-13-e008937-s001.pdf]

## SUPPLEMENTAL MATERIAL

### **The Northwell COVID-19 Research Consortium:**

Philippe Akhrass, MD<sup>1</sup>, Stuart Beldner, MD<sup>1</sup>, Neil E. Bernstein, MD<sup>1</sup>, Kabir Bhasin, MD<sup>1</sup>,  
John Chelico, MD<sup>2</sup>, Jason Chinitz, MD<sup>1</sup>, Stuart L. Cohen, MD<sup>3</sup>, Amir Gandomi, PhD<sup>4</sup>,  
Deepika George MBA<sup>2</sup>, Bruce Goldner, MD<sup>1</sup>, Rajat Goyal, MD<sup>1</sup>, Roy M. John, MD, PhD<sup>1</sup>,  
Haisam Ismail, MD<sup>1</sup>, Ram Jadonath, MD<sup>1</sup>, Beom Soo Kim, MD<sup>5</sup>, Marcin Kowalski, MD<sup>1</sup>,  
Paul Maccaro, MD<sup>1</sup>, Ramanak Mitra, MD PhD<sup>1</sup>, Rina Shah, MD<sup>1</sup>, Nicholas Skipitaris, MD<sup>1</sup>,  
Granit Veseli, MD<sup>1</sup>, Jonathan Willner, MD<sup>1</sup>

<sup>1</sup>Department of Cardiology, <sup>2</sup>Institute of Health Innovations and Outcomes Research & Center for Research Informatics & Innovation Feinberg Institutes for Medical Research, <sup>3</sup>Department of Radiology, <sup>5</sup>Department of Medicine, Northwell Health; <sup>4</sup>Information Systems and Business Analytics, Frank G. Zarb School of Business, Hofstra University, New York, NY
